# Supplementary material
Source: Elsevier journal article supplement (https://www.sciencedirect.com/science/article/pii/S0944711320300507)
Supplement: mmc1 [file 1-s2.0-S0944711320300507-mmc1.pdf]

## SUPPLEMENT 1

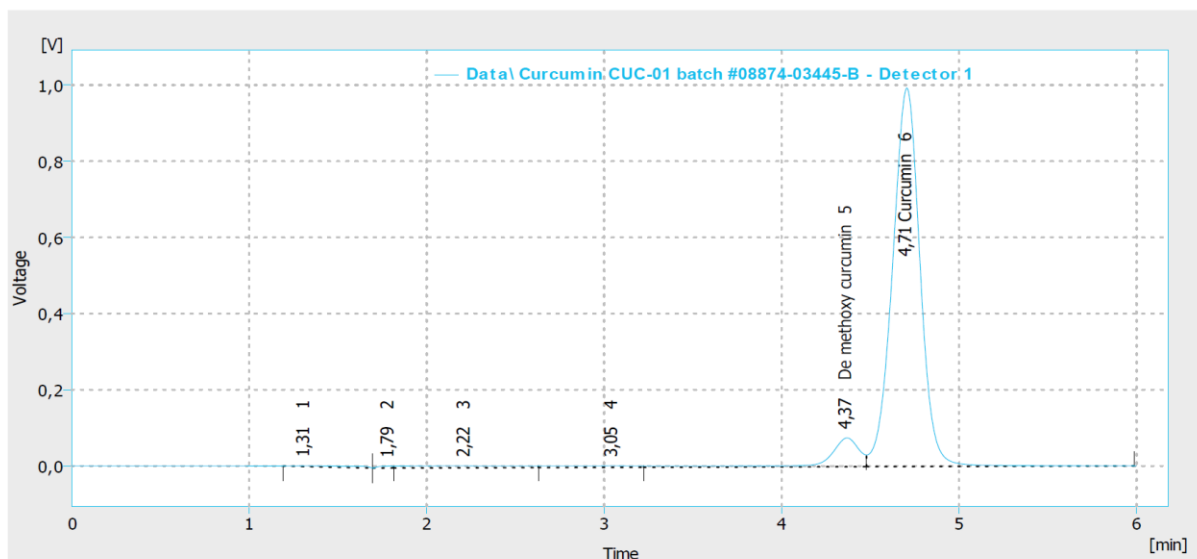

**Figure 1.** HPLC fingerprints at 425 nm of curcuminoids in the CUC-1 preparation for intravenous infusion analyzed by the Merc Hitachi LC system. The HPLC column (Nucleodur Gravity C18 Macherey Nagel, 4.6 x 250 mm) packed with octadecyl silica (5  $\mu$ m) was eluted with the solvent system containing 60 % of acetonitrile in 2% acetic acid solution at 30°C at a flow rate of 1.5 ml/min. The content of analytical markers in the solution was quantified using reference standards for the generation of calibration curves. The analytical method was validated for selectivity, precision, and accuracy (RSD<5%).
