# Supplementary material
Source: Elsevier journal article supplement (https://www.sciencedirect.com/science/article/pii/S0944711320300507)
Supplement: mmc2 [file 1-s2.0-S0944711320300507-mmc2.pdf]

# CASE REPORT FORM

## STUDY OF EFFICACY OF CURCUMIN IN COMBINATION WITH CHEMOTHERAPY IN PATIENTS WITH ADVANCED BREAST CANCER: RANDOMIZED, DOULBE BLIND, PLACEBO CONTROLLED CLINICAL TRIAL

**SHORT TITLE: "CURCUMIN" IN COMBINATION WITH CHEMOTHERAPY**

Principal Investigator: Tatul Saghatelyan, MD, PhD  
 Sponsor: BRIU GmbH Konigstein, Hessen, Germany  
 ClinicalTrials.gov Identifier: NCT03072992  
 Name of site: *National Center of Oncology (NCO), Yerevan, Armenia*  
 CRF Version Number: 1.0, 25/09/2016, Final.

|                                                                          |                                                |
|--------------------------------------------------------------------------|------------------------------------------------|
| Patient's name and surname:                                              |                                                |
| Patient's entry Number                                                   | TREATMENT CODE                                 |
| Sex                                                                      | Screening date:                                |
| <input type="checkbox"/> Male <input checked="" type="checkbox"/> Female |                                                |
| Age (years)                                                              | Accrual date:                                  |
| Height (cm)                                                              | Date: _____<br>Investigators' signature: _____ |
| Weight (kg)                                                              | Date: _____<br>Monitor's signature: _____      |

# CONTENTS

|                                                                       |    |
|-----------------------------------------------------------------------|----|
| CRF Completion Instructions.....                                      | 3  |
| VISIT 1 (SCREENING) demographic data, Med. History .....              | 4  |
| VISIT 1 (SCREENING) <b>Clinical exam</b> .....                        | 5  |
| VISIT 1 (SCREENING) <b>vital signs &amp; ECG</b> .....                | 6  |
| VISIT 1 (SCREENING) <b>HAEMATOLOGY</b> .....                          | 7  |
| VISIT 1 (SCREENING) <b>BIOCHEMISTRY</b> .....                         | 8  |
| VISIT 1 (SCREENING) <b>Tumor Markers</b> .....                        | 9  |
| VISIT 1 (SCREENING) <b>Urinalysis</b> .....                           | 9  |
| VISIT 1 (SCREENING) Concomitant Medications.....                      | 10 |
| VISIT 1 (SCREENING) <b>X-Ray</b> .....                                | 11 |
| VISIT 1 (SCREENING) <b>CT</b> .....                                   | 12 |
| VISIT 1 (SCREENING) <b>MRI</b> .....                                  | 13 |
| VISIT 1 (SCREENING) <b>Inclusion Criteria</b> .....                   | 14 |
| VISIT 1 (SCREENING) <b>exclusion Criteria</b> .....                   | 15 |
| VISIT 1 (SCREENING) participant eligibility review .....              | 16 |
| VISIT 1 randomisation / ENROLMENT.....                                | 16 |
| VISIT 2-13 (Treatment) <b>CHECKLIST</b> .....                         | 17 |
| VISIT 2-13 (Treatment) <b>Clinical exam</b> .....                     | 18 |
| VISIT 2-13 (Treatment) <b>vital signs</b> .....                       | 19 |
| VISIT 2-13 (Treatment) <b>HAEMATOLOGY</b> .....                       | 19 |
| VISIT 2-13 (Treatment) <b>BIOCHEMISTRY</b> .....                      | 20 |
| VISIT 2-13 (Treatment) OTHER TESTS.....                               | 21 |
| VISIT 2-13 OTHER TESTS .....                                          | 21 |
| VISIT 2-13 (Treatment) Trial medication administration .....          | 22 |
| Administration of Medication and Return quantity .....                | 23 |
| Visit 14 (Follow-up) Clinical Examination.....                        | 24 |
| Visit 14 (Follow-up) vital signs .....                                | 25 |
| Visit 14 (Follow-up) HAEMATOLOGY .....                                | 25 |
| Visit 14 (Follow-up)BIOCHEMISTRY.....                                 | 26 |
| Visit 14 (Follow-up)RECIST tests .....                                | 27 |
| Visit 15 (Follow-up)Clinical Examination.....                         | 28 |
| Visit 15 (Follow-up) vital signs .....                                | 29 |
| Visit 15 (Follow-up) other assessments.....                           | 29 |
| Visit 15 (Follow-up) Primary outcomes .....                           | 30 |
| Visit 15 (Follow-up) Secondary outcomes .....                         | 31 |
| Trial COMPLETION.....                                                 | 32 |
| ADVERSE EVENTS PAGE .....                                             | 33 |
| Concomitant Medications LOG.....                                      | 35 |
| PRINCIPAL INVESTIGATOR'S SIGN OFF .....                               | 37 |
| QoL Assessments (EORTC QLQ-C30, Global Health Status/QoL scales)..... | 38 |
| Patient Information Leaflet.....                                      | 39 |
| Informed Consent form.....                                            | 40 |

Completed by: \_\_\_\_\_

Name

Signature

Date

# CRF COMPLETION INSTRUCTIONS

## General

Complete the CRF using a **black or blue ballpoint pen** and ensure that all entries are complete and legible.

Avoid the use of abbreviations and acronyms.

The CRF should be completed as soon as possible after the scheduled visit.

Each CRF page should be signed and dated by the person completing the form.

The 'completed by' Name in the footer of each page must be legible and **CRFs should only be completed by individuals delegated to complete CRFs on the Site Delegation log (and signed by the PI).**

Ensure that all fields are completed on each page:

- If a test was Not Done record **ND** in the relevant box(es)
- Where information is Not Known write **NK** in relevant box(es)
- Where information is not applicable write **NA** in the relevant box(es)

## Corrections to entries

If an error is made, draw a single line through the item, then write the correct entry on an appropriate blank space near the original data point on the CRF and initial and date the change.

### Do NOT

- Obscure the original entry by scribbling it out
- Try to correct/ modify the original entry
- Use Tippex or correction fluid

Medications taken by the subject during the trial should be recorded on the "Concomitant Medications Log" using the generic name whenever possible, except combination products which will be recorded using the established trade name. All non-IMPs mentioned in the protocol should also be recorded on the "Concomitant medication Log" for the duration of the trial.

Verbatim Adverse Event terms (initial medical term) should be recorded as the final diagnosis whenever possible.

Complete all **dates** as day, month, year i.e. 27/07/1975. Partial dates should be recorded as NK/MM/2008.

All **times** are to be recorded in 24 hour format without punctuation and always use 4-digits; i.e. 0200 or 2130. Midnight is recorded as 0000.

Weights should be recorded to the nearest 0.1 kg.

Source documents such as lab reports, ECG reports etc. should be filed separately from the CRF (if not in the medical notes) for each subject and be signed and dated by a delegated Investigator as proof of review of the assessment during the trial. Questionnaire should be considered as the CRF appendices (except standard approved questionnaire e.g. EQ-5D)

If a subject prematurely withdraws from the trial a single line must be drawn across each uncompleted page to correspond with the last visit of the subject as mentioned on the "Trial Completion" page.

The protocol deviation/violation/serious breach log should be used to record comments relating to each CRF visit that cannot be captured on the page itself. This includes reason for delayed or missed protocol visits or trial assessments, unscheduled visits etc.

The Chief Investigator (for lead site)/Principal Investigator is responsible for the accuracy of the data reported on the CRF. The CI/PI must sign and date the Principal Investigator's Sign Off page to certify accuracy, completeness and legibility of the data reported in the CRF.

## Serious Adverse Events (SAEs)

SAEs should be faxed **within 24 hours** of the site being aware of the event using the trial specific SAE report form to \_\_\_\_\_ (phone, email.)

## Storage

CRF documents should be stored in a locked, secure area when not in use where confidentiality can be maintained. Ensure that they are stored separately to any other documents that might reveal the identity of the subject

Completed by: \_\_\_\_\_

Name

Signature

Date

Patient:

Patient's entry No.

**VISIT 1 (SCREENING) DEMOGRAPHIC DATA, MED. HISTORY**

Date of Assessment: \_\_\_ / \_\_\_ / \_\_\_\_\_  
(DD / MMM / YYYY)

|                          |                                                                  |
|--------------------------|------------------------------------------------------------------|
| <b>Demographic Data:</b> |                                                                  |
| <b>Date of Birth:</b>    | ___ / ___ / _____ (DD / MMM / YYYY)                              |
| <b>Sex:</b>              | <input type="checkbox"/> Male<br><input type="checkbox"/> Female |

|                                                               |                                     |
|---------------------------------------------------------------|-------------------------------------|
| <b>Informed Consent:</b>                                      |                                     |
| <b>Date participant/relative signed written consent form:</b> | ___ / ___ / _____ (DD / MMM / YYYY) |
| <b>Date of first trial-related procedure:</b>                 | ___ / ___ / _____ (DD / MMM / YYYY) |
| <b>Name of person taking informed consent:</b> _____          |                                     |

| Has the patient had any relevant medical history? | <input type="checkbox"/> No <input type="checkbox"/> Yes, Complete below |                         |                                        |
|---------------------------------------------------|--------------------------------------------------------------------------|-------------------------|----------------------------------------|
| Condition / illness /surgical procedure           | Start date (DD/MMM/YYYY)                                                 | Stop date (DD/MMM/YYYY) | Or tick if ongoing at Screening Visit? |
|                                                   | ___ / ___ / ___                                                          | ___ / ___ / ___         | <input type="checkbox"/>               |
|                                                   | ___ / ___ / ___                                                          | ___ / ___ / ___         | <input type="checkbox"/>               |
|                                                   | ___ / ___ / ___                                                          | ___ / ___ / ___         | <input type="checkbox"/>               |
|                                                   | ___ / ___ / ___                                                          | ___ / ___ / ___         | <input type="checkbox"/>               |
|                                                   | ___ / ___ / ___                                                          | ___ / ___ / ___         | <input type="checkbox"/>               |
|                                                   | ___ / ___ / ___                                                          | ___ / ___ / ___         | <input type="checkbox"/>               |
|                                                   | ___ / ___ / ___                                                          | ___ / ___ / ___         | <input type="checkbox"/>               |
|                                                   |                                                                          |                         |                                        |

Completed by: \_\_\_\_\_  
Name Signature Date

Patient: Name, Surname

Patient's entry No.

## VISIT 1 (SCREENING) CLINICAL EXAM

Date of Assessment: \_\_\_ / \_\_\_ / \_\_\_\_\_  
(DD /MM / YYYY)

| Was Physical Examination performed?  |                          |                          |                          | <input type="checkbox"/> No <input type="checkbox"/> Yes, Complete below                                   |
|--------------------------------------|--------------------------|--------------------------|--------------------------|------------------------------------------------------------------------------------------------------------|
| System                               | *Abnormal                | Normal                   | Not done                 | *If noted ABNORMAL, please provide brief description and comment if clinically significant or not (CS/NCS) |
| <i>General Appearance</i>            | <input type="checkbox"/> | <input type="checkbox"/> | <input type="checkbox"/> |                                                                                                            |
| <i>Skin</i>                          | <input type="checkbox"/> | <input type="checkbox"/> | <input type="checkbox"/> |                                                                                                            |
| <i>Eyes, Ears, Nose &amp; Throat</i> | <input type="checkbox"/> | <input type="checkbox"/> | <input type="checkbox"/> |                                                                                                            |
| <i>Head, Neck &amp; Thyroid</i>      | <input type="checkbox"/> | <input type="checkbox"/> | <input type="checkbox"/> |                                                                                                            |
| <i>Cardiovascular</i>                | <input type="checkbox"/> | <input type="checkbox"/> | <input type="checkbox"/> |                                                                                                            |
| <i>Respiratory</i>                   | <input type="checkbox"/> | <input type="checkbox"/> | <input type="checkbox"/> |                                                                                                            |
| <i>Abdomen</i>                       | <input type="checkbox"/> | <input type="checkbox"/> | <input type="checkbox"/> |                                                                                                            |
| <i>Extremities</i>                   | <input type="checkbox"/> | <input type="checkbox"/> | <input type="checkbox"/> |                                                                                                            |
| <i>Genitalia</i>                     | <input type="checkbox"/> | <input type="checkbox"/> | <input type="checkbox"/> |                                                                                                            |
| <i>Anorectal</i>                     | <input type="checkbox"/> | <input type="checkbox"/> | <input type="checkbox"/> |                                                                                                            |
| <i>Lymph Nodes</i>                   | <input type="checkbox"/> | <input type="checkbox"/> | <input type="checkbox"/> |                                                                                                            |
| <i>Muscular-Skeletal</i>             | <input type="checkbox"/> | <input type="checkbox"/> | <input type="checkbox"/> |                                                                                                            |
| <i>Neurological</i>                  | <input type="checkbox"/> | <input type="checkbox"/> | <input type="checkbox"/> |                                                                                                            |
| <i>Breast/chestwall</i>              | <input type="checkbox"/> | <input type="checkbox"/> | <input type="checkbox"/> |                                                                                                            |
| <i>Others (please specify)</i>       | <input type="checkbox"/> | <input type="checkbox"/> | <input type="checkbox"/> |                                                                                                            |

| <b>Patient's performance status</b>         |  |
|---------------------------------------------|--|
| <i>Karnofsky performance score (KPS), %</i> |  |
| <i>ECOG score</i>                           |  |

Completed by: \_\_\_\_\_  
Name Signature Date

Patient: Name, Surname

Patient's entry No.

## VISIT 1 (SCREENING) VITAL SIGNS & ECG

|                                  |                                                                                                             |
|----------------------------------|-------------------------------------------------------------------------------------------------------------|
| Were Vital Signs performed?      | <input type="checkbox"/> No (comment below) <input type="checkbox"/> Yes, Complete below<br>Comment*: _____ |
| Date of Vital Signs:             | ____ / ____ / ____<br>(DD / MMM / YYYY)                                                                     |
| Time of Vital Signs:             | ____ : ____<br>HH:MM                                                                                        |
| Blood Pressure: ____ / ____ mmHg |                                                                                                             |
| Pulse: ____ beats/min            |                                                                                                             |
| Weight: ____ . ____ kg           | Height: ____ . ____ m                                                                                       |
| Temperature: ____ . ____ °C      |                                                                                                             |

|                       |                                                                                                                                                                                                               |
|-----------------------|---------------------------------------------------------------------------------------------------------------------------------------------------------------------------------------------------------------|
| Was an ECG performed? | <input type="checkbox"/> No (comment below) <input type="checkbox"/> Yes, Complete below<br>Comment*: _____                                                                                                   |
| Date & Time of ECG:   | ____ / ____ / ____ : ____<br>(DD / MMM / YYYY) HH:MM                                                                                                                                                          |
| The ECG is:           | <input type="checkbox"/> Within normal limits<br><br><input type="checkbox"/> Abnormal, NOT clinically significant<br><br><input type="checkbox"/> Abnormal, clinically significant, please specify:<br>_____ |

Patient:

Name, Surname

Patient's  
entry No.

|  |  |  |
|--|--|--|
|  |  |  |
|--|--|--|

**VISIT 1 (SCREENING) HAEMATOLOGY**

Clinical Haematology Laboratory tests performed?  No (comment below)  Yes, Complete below

Comment: \_\_\_\_\_

Date of Sample: \_\_\_\_ / \_\_\_\_ / \_\_\_\_  
(DD / MMM / YYYY)

| HAEMATOLOGY<br>Laboratory Parameter | Value | Unit | If parameter indicated as out of<br>normal range on report, please check<br>if clinically significant: |
|-------------------------------------|-------|------|--------------------------------------------------------------------------------------------------------|
| WBC                                 |       |      | <input type="checkbox"/> No <input type="checkbox"/> Yes                                               |
| RBC                                 |       |      | <input type="checkbox"/> No <input type="checkbox"/> Yes                                               |
| Hb                                  |       |      | <input type="checkbox"/> No <input type="checkbox"/> Yes                                               |
| HCT                                 |       |      | <input type="checkbox"/> No <input type="checkbox"/> Yes                                               |
| MCV                                 |       |      | <input type="checkbox"/> No <input type="checkbox"/> Yes                                               |
| MCH                                 |       |      | <input type="checkbox"/> No <input type="checkbox"/> Yes                                               |
| PLT                                 |       |      | <input type="checkbox"/> No <input type="checkbox"/> Yes                                               |
| NEUTROPHILS                         |       |      | <input type="checkbox"/> No <input type="checkbox"/> Yes                                               |
| LYMPHOCYTES                         |       |      | <input type="checkbox"/> No <input type="checkbox"/> Yes                                               |
| MONOCYTES                           |       |      | <input type="checkbox"/> No <input type="checkbox"/> Yes                                               |
| EOSINOPHILS                         |       |      | <input type="checkbox"/> No <input type="checkbox"/> Yes                                               |
| BASOPHILS                           |       |      | <input type="checkbox"/> No <input type="checkbox"/> Yes                                               |
| RETICULOCYTES                       |       |      | <input type="checkbox"/> No <input type="checkbox"/> Yes                                               |
| ESR                                 |       | mm/h | <input type="checkbox"/> No <input type="checkbox"/> Yes                                               |

Completed by: \_\_\_\_\_

Name

Signature

Date

Patient: Name, Surname

Patient's entry No.

## VISIT 1 (SCREENING) BIOCHEMISTRY

No (comment below)     Yes, Complete below

Clinical Biochemistry Laboratory tests performed? Comment: \_\_\_\_\_

---

Date of Sample: \_\_\_\_\_ / \_\_\_\_\_ / \_\_\_\_\_  
 (DD /MM / YYYY)

| BIOCHEMISTRY<br>Laboratory Parameter | Value | Unit | If parameter indicated as out of normal range on report, please check if clinically significant: |
|--------------------------------------|-------|------|--------------------------------------------------------------------------------------------------|
| GLUCOSE                              |       |      | <input type="checkbox"/> No <input type="checkbox"/> Yes                                         |
| UREA                                 |       |      | <input type="checkbox"/> No <input type="checkbox"/> Yes                                         |
| CREATININE                           |       |      | <input type="checkbox"/> No <input type="checkbox"/> Yes                                         |
| TOTAL PROTEIN                        |       |      | <input type="checkbox"/> No <input type="checkbox"/> Yes                                         |
| TOTAL BILIRUBIN                      |       |      | <input type="checkbox"/> No <input type="checkbox"/> Yes                                         |
| ALK PHOS                             |       |      | <input type="checkbox"/> No <input type="checkbox"/> Yes                                         |
| ALT                                  |       |      | <input type="checkbox"/> No <input type="checkbox"/> Yes                                         |
| AST                                  |       |      | <input type="checkbox"/> No <input type="checkbox"/> Yes                                         |
| GGT                                  |       |      | <input type="checkbox"/> No <input type="checkbox"/> Yes                                         |
| LDH                                  |       |      | <input type="checkbox"/> No <input type="checkbox"/> Yes                                         |
| CALCIUM                              |       |      | <input type="checkbox"/> No <input type="checkbox"/> Yes                                         |
| PROTROMBINE                          |       |      | <input type="checkbox"/> No <input type="checkbox"/> Yes                                         |
| FIBRINOGEN                           |       |      | <input type="checkbox"/> No <input type="checkbox"/> Yes                                         |
|                                      |       |      | <input type="checkbox"/> No <input type="checkbox"/> Yes                                         |
|                                      |       |      | <input type="checkbox"/> No <input type="checkbox"/> Yes                                         |
|                                      |       |      | <input type="checkbox"/> No <input type="checkbox"/> Yes                                         |

Completed by: \_\_\_\_\_



Patient: Name, Surname

Patient's entry No.

## VISIT 1 (SCREENING) TUMOR MARKERS

No (comment below)     Yes, Complete below

Tumour Markers Laboratory tests performed? Comment \*: \_\_\_\_\_

---

Date of Sample: \_\_\_\_ / \_\_\_\_ / \_\_\_\_  
 (DD / MMM / YYYY)

| TUMOR MARKERS<br>Laboratory Parameter | Value | Unit (site to pre-complete prior to the finalization of the template) | If parameter indicated as out of normal range on report, please check if clinically significant: |
|---------------------------------------|-------|-----------------------------------------------------------------------|--------------------------------------------------------------------------------------------------|
| CEA                                   |       |                                                                       | <input type="checkbox"/> No <input type="checkbox"/> Yes                                         |
| CA15-3                                |       |                                                                       | <input type="checkbox"/> No <input type="checkbox"/> Yes                                         |

## VISIT 1 (SCREENING) URINALYSIS

No (comment below)     Yes, Complete below

Urinalysis performed? Comment: \_\_\_\_\_

---

Date of Sample: \_\_\_\_ / \_\_\_\_ / \_\_\_\_  
 (DD / MM / YYYY)

| Urinalysis<br>Laboratory Parameter | Value | Unit | If parameter indicated as out of normal range on report, please check if clinically significant: |
|------------------------------------|-------|------|--------------------------------------------------------------------------------------------------|
| SG                                 |       |      | <input type="checkbox"/> No <input type="checkbox"/> Yes                                         |
| PROTEINS                           |       |      | <input type="checkbox"/> No <input type="checkbox"/> Yes                                         |
| RBC                                |       |      | <input type="checkbox"/> No <input type="checkbox"/> Yes                                         |
| LEUCOCYTES                         |       |      | <input type="checkbox"/> No <input type="checkbox"/> Yes                                         |
| EPITHELIUM                         |       |      | <input type="checkbox"/> No <input type="checkbox"/> Yes                                         |
| YEASTS                             |       |      | <input type="checkbox"/> No <input type="checkbox"/> Yes                                         |
| BACTERIA                           |       |      | <input type="checkbox"/> No <input type="checkbox"/> Yes                                         |
|                                    |       |      | <input type="checkbox"/> No <input type="checkbox"/> Yes                                         |

Completed by: \_\_\_\_\_

Patient: Name, Surname

Patient's entry No.

## VISIT 1 (SCREENING) CONCOMITANT MEDICATIONS

Date of Assessment: \_\_\_ / \_\_\_ / \_\_\_\_\_

(DD / MMM / YYYY)

| Is the participant taken any concomitant medications at screening or <insert time frame as specified in protocol> |                                                                                 |                |           |       | <input type="checkbox"/> No <input type="checkbox"/> Yes, Complete below |                         |                                       |
|-------------------------------------------------------------------------------------------------------------------|---------------------------------------------------------------------------------|----------------|-----------|-------|--------------------------------------------------------------------------|-------------------------|---------------------------------------|
| Medication<br>(Record Generic or trade name)                                                                      | Reason for use<br>(Medical History diagnosis or other reason, e.g. Prophylaxis) | Dose and units | Frequency | Route | Start Date (DD/MMM/YYYY)                                                 | Stop Date (DD/MMM/YYYY) | Or tick if ongoing at Screening Visit |
| 1.                                                                                                                |                                                                                 |                |           |       | ___/___/___                                                              | ___/___/___             | <input type="checkbox"/>              |
| 2.                                                                                                                |                                                                                 |                |           |       | ___/___/___                                                              | ___/___/___             | <input type="checkbox"/>              |
| 3.                                                                                                                |                                                                                 |                |           |       | ___/___/___                                                              | ___/___/___             | <input type="checkbox"/>              |
| 4.                                                                                                                |                                                                                 |                |           |       | ___/___/___                                                              | ___/___/___             | <input type="checkbox"/>              |
| 5.                                                                                                                |                                                                                 |                |           |       | ___/___/___                                                              | ___/___/___             | <input type="checkbox"/>              |
| 6.                                                                                                                |                                                                                 |                |           |       | ___/___/___                                                              | ___/___/___             | <input type="checkbox"/>              |
| 7.                                                                                                                |                                                                                 |                |           |       | ___/___/___                                                              | ___/___/___             | <input type="checkbox"/>              |
| 8.                                                                                                                |                                                                                 |                |           |       | ___/___/___                                                              | ___/___/___             | <input type="checkbox"/>              |
| 9.                                                                                                                |                                                                                 |                |           |       | ___/___/___                                                              | ___/___/___             | <input type="checkbox"/>              |
| 10.                                                                                                               |                                                                                 |                |           |       | ___/___/___                                                              | ___/___/___             | <input type="checkbox"/>              |

Completed by: \_\_\_\_\_

Patient: Name, Surname

Patient's entry No.

## VISIT 1 (SCREENING) X-RAY

|                                |                                                                                                                                                                      |
|--------------------------------|----------------------------------------------------------------------------------------------------------------------------------------------------------------------|
| <p><b>X-ray performed?</b></p> | <p><input type="checkbox"/> <b>No (comment below)</b>    <input type="checkbox"/> <b>Yes, Complete below</b></p> <p style="text-align: center;">Comment *: _____</p> |
| <p><b>Date of Sample:</b></p>  | <p style="text-align: center;">___ / ___ / _____ (DD / MM / YYYY)</p>                                                                                                |

|                                                                  |                          |                          |
|------------------------------------------------------------------|--------------------------|--------------------------|
| <b>Does the X-ray reveal bidimensionally measurable disease?</b> | <b>Yes</b>               | <b>No</b>                |
|                                                                  | <input type="checkbox"/> | <input type="checkbox"/> |

Completed by: \_\_\_\_\_  
Name
Signature
Date

**Patient:**

**Patient's entry No.**

**VISIT 1 (SCREENING) CT**

**CT performed?**  **No (comment below)**  **Yes, Complete below**  
**Comment \*:** \_\_\_\_\_

**Date of Study:** \_\_\_\_ / \_\_\_\_ / \_\_\_\_\_ (DD / MM / YYYY)

|                                                               |                          |                          |
|---------------------------------------------------------------|--------------------------|--------------------------|
| <b>Does the CT reveal bidimensionally measurable disease?</b> | <b>Yes</b>               | <b>No</b>                |
|                                                               | <input type="checkbox"/> | <input type="checkbox"/> |

Completed by: \_\_\_\_\_  
Name Signature Date

Patient:

Patient's entry No.

**VISIT 1 (SCREENING) MRI**

|                        |                                                                                                        |
|------------------------|--------------------------------------------------------------------------------------------------------|
| <b>MRI performed?</b>  | <input type="checkbox"/> <b>No (comment below)</b> <input type="checkbox"/> <b>Yes, Complete below</b> |
|                        | <b>Comment *:</b> _____                                                                                |
| <b>Date of Sample:</b> | ____ / ____ / _____ (DD / MM / YYYY)                                                                   |

|                                                                |                          |                          |
|----------------------------------------------------------------|--------------------------|--------------------------|
| <b>Does the MRI reveal bidimensionally measurable disease?</b> | <b>Yes</b>               | <b>No</b>                |
|                                                                | <input type="checkbox"/> | <input type="checkbox"/> |

Patient: Name, Surname

## VISIT 1 (SCREENING) INCLUSION CRITERIA

Date of Assessment: \_\_\_ / \_\_\_ / \_\_\_\_\_

(DD / MMM / YYYY)

|                                                                                                                                                                                                                                             | The following criteria MUST be answered YES for participant to be included in the trial (except where NA is appropriate):                                                                                                                                                                                                                                                               | Yes                      | No                       | N/A                      |
|---------------------------------------------------------------------------------------------------------------------------------------------------------------------------------------------------------------------------------------------|-----------------------------------------------------------------------------------------------------------------------------------------------------------------------------------------------------------------------------------------------------------------------------------------------------------------------------------------------------------------------------------------|--------------------------|--------------------------|--------------------------|
| 1.                                                                                                                                                                                                                                          | <i>Patient is able to give fully informed written consent according to International Conference on Harmonisation (ICH)/Good Clinical Practice (GCP) guidelines and to comply with the instructions in the protocol</i>                                                                                                                                                                  | <input type="checkbox"/> | <input type="checkbox"/> | <input type="checkbox"/> |
| 2.                                                                                                                                                                                                                                          | <i>Patients is diagnosed with histologically-proven breast carcinoma (adenocarcinoma), 2016 ICD-10-CM Diagnosis Code C.50-, <a href="http://www.icd10data.com/ICD10CM/Codes/C00-D49/C50-C50/C50-">http://www.icd10data.com/ICD10CM/Codes/C00-D49/C50-C50/C50-</a></i>                                                                                                                   | <input type="checkbox"/> | <input type="checkbox"/> | <input type="checkbox"/> |
| 3.                                                                                                                                                                                                                                          | <i>Patient's age is 18 to 75 years</i>                                                                                                                                                                                                                                                                                                                                                  | <input type="checkbox"/> | <input type="checkbox"/> | <input type="checkbox"/> |
| 4.                                                                                                                                                                                                                                          | <i>Patient has radiographic/clinical evidence of measurable disease with CT, X-ray, MRI performed within 8 weeks prior to randomization</i>                                                                                                                                                                                                                                             | <input type="checkbox"/> | <input type="checkbox"/> | <input type="checkbox"/> |
| 5.                                                                                                                                                                                                                                          | <i>Patient has bidimensionally measurable manifestations of progressive advanced disease after one prior chemotherapy regimen, or has locally advanced or MBC that progressed during or within 12 months of completing an adjuvant or neoadjuvant chemotherapy regimen or other cases of breast cancer in which weekly paclitaxel treatment is considered an adequate approach.</i>     | <input type="checkbox"/> | <input type="checkbox"/> | <input type="checkbox"/> |
| 6.                                                                                                                                                                                                                                          | <i>No Herceptin and/or other chemotherapy and/or bisphosphonate therapy 4 weeks before random assignment and during the study</i>                                                                                                                                                                                                                                                       | <input type="checkbox"/> | <input type="checkbox"/> | <input type="checkbox"/> |
| 7.                                                                                                                                                                                                                                          | <i>Patient uses effective contraception (For women of child-bearing age )</i>                                                                                                                                                                                                                                                                                                           | <input type="checkbox"/> | <input type="checkbox"/> | <input type="checkbox"/> |
| 8.                                                                                                                                                                                                                                          | <i>Life expectancy 3 month or greater</i>                                                                                                                                                                                                                                                                                                                                               | <input type="checkbox"/> | <input type="checkbox"/> | <input type="checkbox"/> |
| 9.                                                                                                                                                                                                                                          | <i>Karnofsky performance score (KPS) ≥60, ECOG≤2</i>                                                                                                                                                                                                                                                                                                                                    | <input type="checkbox"/> | <input type="checkbox"/> | <input type="checkbox"/> |
| 10.                                                                                                                                                                                                                                         | <i>Sufficient hematological status. Adequate bone marrow function defined as:</i><br><ul style="list-style-type: none"> <li>○ <i>WBC greater than 4.0 x 10<sup>9</sup>/L</i></li> <li>○ <i>Granulocyte count greater than 1.5 x 10<sup>9</sup>/L</i></li> <li>○ <i>Platelet count greater than 100 x 10<sup>9</sup>/L</i></li> <li>○ <i>Haemoglobin greater than 10 g/dl</i></li> </ul> | <input type="checkbox"/> | <input type="checkbox"/> | <input type="checkbox"/> |
| 11.                                                                                                                                                                                                                                         | <i>Adequate renal function: calculated creatinine clearance (Cockcroft-Gault formula) greater than 45 ml/min</i>                                                                                                                                                                                                                                                                        | <input type="checkbox"/> | <input type="checkbox"/> | <input type="checkbox"/> |
| 12.                                                                                                                                                                                                                                         | <i>Adequate hepatic function defined as a total bilirubin less than Upper Limit of Normal (ULN), Alanine Aminotransferase (ALT) or Aspartate Aminotransferase (AST) less than 2.5 x ULN, or 1.5 x ULN if Alkaline Phosphatase (Alk Phos) less than 2.5 x ULN. Alk Phos less than 5 x ULN unless patient has bone metastases</i>                                                         | <input type="checkbox"/> | <input type="checkbox"/> | <input type="checkbox"/> |
| <b>If any of the above criteria is answered NO, the participant is NOT eligible for the trial and must not be included in the study. Please list reason(s) for ineligibility for screen failure on Participant Eligibility Review page.</b> |                                                                                                                                                                                                                                                                                                                                                                                         |                          |                          |                          |

Completed by: \_\_\_\_\_  
 Name Signature Date

Patient: 

|               |
|---------------|
| Name, Surname |
|---------------|

## VISIT 1 (SCREENING) EXCLUSION CRITERIA

Date of Assessment: \_\_\_ / \_\_\_ / \_\_\_  
 (DD / MMM / YYYY)

| <b>The following criteria MUST be answered NO for the participant to be included in the trial:</b>                                                                                                                                           |                                                                                                                                                                                                                 | <b>Yes</b>               | <b>No</b>                |
|----------------------------------------------------------------------------------------------------------------------------------------------------------------------------------------------------------------------------------------------|-----------------------------------------------------------------------------------------------------------------------------------------------------------------------------------------------------------------|--------------------------|--------------------------|
| 1.                                                                                                                                                                                                                                           | <i>Karnofsky performance score (KPS) &lt;60, ECOG&gt;2</i>                                                                                                                                                      | <input type="checkbox"/> | <input type="checkbox"/> |
| 2.                                                                                                                                                                                                                                           | <i>Life expectancy less than 3 months</i>                                                                                                                                                                       | <input type="checkbox"/> | <input type="checkbox"/> |
| 3.                                                                                                                                                                                                                                           | <i>inadequate haematological status</i>                                                                                                                                                                         | <input type="checkbox"/> | <input type="checkbox"/> |
| 4.                                                                                                                                                                                                                                           | <i>inadequate renal and hepatic functions</i>                                                                                                                                                                   | <input type="checkbox"/> | <input type="checkbox"/> |
| 5.                                                                                                                                                                                                                                           | <i>uncontrolled central nervous system metastases,</i>                                                                                                                                                          | <input type="checkbox"/> | <input type="checkbox"/> |
| 6.                                                                                                                                                                                                                                           | <i>severe cardiovascular disorders,</i>                                                                                                                                                                         | <input type="checkbox"/> | <input type="checkbox"/> |
| 7.                                                                                                                                                                                                                                           | <i>active infection</i>                                                                                                                                                                                         | <input type="checkbox"/> | <input type="checkbox"/> |
| 8.                                                                                                                                                                                                                                           | <i>Psychiatric or addictive disorders or other conditions that, in the opinion of the investigator, would preclude the patient from meeting the study requirements</i>                                          | <input type="checkbox"/> | <input type="checkbox"/> |
| 9.                                                                                                                                                                                                                                           | <i>Other non-malignant systemic and/or other disease, that would preclude the patient from receiving study treatment or would prevent required follow-up (at the discretion of the principal investigator),</i> | <input type="checkbox"/> | <input type="checkbox"/> |
| 10.                                                                                                                                                                                                                                          | <i>Known hypersensitivity to any of the study drugs or excipients.</i>                                                                                                                                          | <input type="checkbox"/> | <input type="checkbox"/> |
| 11.                                                                                                                                                                                                                                          | <i>Pregnancy or lactation</i>                                                                                                                                                                                   | <input type="checkbox"/> | <input type="checkbox"/> |
| 12.                                                                                                                                                                                                                                          | <i>Second primary malignancy diagnosed within the last 5 years (except for adequately treated non-melanomaskin cancers and in-situ cervical carcinoma adequately treated by cone excision)</i>                  | <input type="checkbox"/> | <input type="checkbox"/> |
| 13.                                                                                                                                                                                                                                          | <i>Herceptin and/or chemotherapy and/or bisphosphonate therapy less than 4 weeks before the randomisation</i>                                                                                                   | <input type="checkbox"/> | <input type="checkbox"/> |
| <b>If any of the above criteria is answered YES, the participant is NOT eligible for the trial and must not be included in the study. Please list reason(s) for ineligibility for screen failure on Participant Eligibility Review page.</b> |                                                                                                                                                                                                                 |                          |                          |

Completed by: \_\_\_\_\_  
 Name Signature Date

Patient:

Patient's entry No.

**VISIT 1 (SCREENING) PARTICIPANT ELIGIBILITY REVIEW**

| End of Screening Visit Checklist: |                                                                            |                          |                          |
|-----------------------------------|----------------------------------------------------------------------------|--------------------------|--------------------------|
|                                   |                                                                            | Yes                      | No                       |
| 1.                                | Does the participant satisfy the inclusion and exclusion criteria to date? | <input type="checkbox"/> | <input type="checkbox"/> |
| 2.                                | Have all Screening Visit procedures been completed?                        | <input type="checkbox"/> | <input type="checkbox"/> |
| 3.                                | Have the Medical History and Concomitant Medication pages been completed?  | <input type="checkbox"/> | <input type="checkbox"/> |
| 4.                                | Is the participant still willing to proceed in the trial?                  | <input type="checkbox"/> | <input type="checkbox"/> |

|                                                                            |                                                                          |
|----------------------------------------------------------------------------|--------------------------------------------------------------------------|
| <b>Participant's eligibility Investigator Sign-Off:</b>                    |                                                                          |
| Is the participant eligible to take part in the Clinical Trial?            | <input type="checkbox"/> Yes                                             |
| Investigator's Signature: _____ Date : __ / __ / ____<br>(DD / MMM / YYYY) | <input type="checkbox"/> No, Please give reason for screen failure below |
| Investigator's Name: _____                                                 |                                                                          |
| <b>Reason(s) for screen failure:</b>                                       |                                                                          |
| 1.                                                                         |                                                                          |
| 2.                                                                         |                                                                          |
| 3.                                                                         |                                                                          |

**VISIT 1 RANDOMISATION / ENROLMENT**

|                                            |                                    |
|--------------------------------------------|------------------------------------|
| <b>Participant Randomisation/Enrolment</b> |                                    |
| Participant study Number allocated:        | _____                              |
| Date of Randomisation/Enrolment:           | __ / __ / ____<br>(DD / MM / YYYY) |

PI's signature \_\_\_\_\_

Completed by: \_\_\_\_\_  
Name Signature Date



Patient:

Name, Surname

Patient's  
entry No.

|  |  |  |
|--|--|--|
|  |  |  |
|--|--|--|

## VISIT 2-13(TREATMENT)CHECKLIST

Date of Visit:

\_\_\_/\_\_\_/\_\_\_\_\_  
(DD / MMM / YYYY)

**Visit Checklist:**

|    |                                                                                                                          | Yes                      | No                       |
|----|--------------------------------------------------------------------------------------------------------------------------|--------------------------|--------------------------|
| 1. | <b>Have there been any new Adverse Events?</b><br>(If yes, please record in Adverse Eventspage)                          | <input type="checkbox"/> | <input type="checkbox"/> |
| 2. | <b>Have there been any changes in Concomitant Medications?</b><br>(If yes, please record in Concomitant Medications Log) | <input type="checkbox"/> | <input type="checkbox"/> |
| 3. |                                                                                                                          | <input type="checkbox"/> | <input type="checkbox"/> |
| 4. |                                                                                                                          | <input type="checkbox"/> | <input type="checkbox"/> |

Completed by: \_\_\_\_\_

Name

Signature

Date

Patient: Name, Surname

Patient's entry No.

## VISIT 2-13 (TREATMENT) CLINICAL EXAM

Date of Assessment: \_\_\_ / \_\_\_ / \_\_\_\_\_

(DD / MM / YYYY)

| Was Physical Examination performed?  |                          |                          |                          | <input type="checkbox"/> No                                                                                | <input type="checkbox"/> Yes, Complete below |
|--------------------------------------|--------------------------|--------------------------|--------------------------|------------------------------------------------------------------------------------------------------------|----------------------------------------------|
| System                               | *Abnormal                | Normal                   | Not done                 | *If noted ABNORMAL, please provide brief description and comment if clinically significant or not (CS/NCS) |                                              |
| <i>General Appearance</i>            | <input type="checkbox"/> | <input type="checkbox"/> | <input type="checkbox"/> |                                                                                                            |                                              |
| <i>Skin</i>                          | <input type="checkbox"/> | <input type="checkbox"/> | <input type="checkbox"/> |                                                                                                            |                                              |
| <i>Eyes, Ears, Nose &amp; Throat</i> | <input type="checkbox"/> | <input type="checkbox"/> | <input type="checkbox"/> |                                                                                                            |                                              |
| <i>Head, Neck &amp; Thyroid</i>      | <input type="checkbox"/> | <input type="checkbox"/> | <input type="checkbox"/> |                                                                                                            |                                              |
| <i>Cardiovascular</i>                | <input type="checkbox"/> | <input type="checkbox"/> | <input type="checkbox"/> |                                                                                                            |                                              |
| <i>Respiratory</i>                   | <input type="checkbox"/> | <input type="checkbox"/> | <input type="checkbox"/> |                                                                                                            |                                              |
| <i>Abdomen</i>                       | <input type="checkbox"/> | <input type="checkbox"/> | <input type="checkbox"/> |                                                                                                            |                                              |
| <i>Extremities</i>                   | <input type="checkbox"/> | <input type="checkbox"/> | <input type="checkbox"/> |                                                                                                            |                                              |
| <i>Genitalia</i>                     | <input type="checkbox"/> | <input type="checkbox"/> | <input type="checkbox"/> |                                                                                                            |                                              |
| <i>Anorectal</i>                     | <input type="checkbox"/> | <input type="checkbox"/> | <input type="checkbox"/> |                                                                                                            |                                              |
| <i>Lymph Nodes</i>                   | <input type="checkbox"/> | <input type="checkbox"/> | <input type="checkbox"/> |                                                                                                            |                                              |
| <i>Muscular-Skeletal</i>             | <input type="checkbox"/> | <input type="checkbox"/> | <input type="checkbox"/> |                                                                                                            |                                              |
| <i>Neurological</i>                  | <input type="checkbox"/> | <input type="checkbox"/> | <input type="checkbox"/> |                                                                                                            |                                              |
| <i>Breast/chestwall</i>              | <input type="checkbox"/> | <input type="checkbox"/> | <input type="checkbox"/> |                                                                                                            |                                              |
| <i>Others (please specify)</i>       | <input type="checkbox"/> | <input type="checkbox"/> | <input type="checkbox"/> |                                                                                                            |                                              |

|                                             |  |
|---------------------------------------------|--|
| <b>Patient's performance status</b>         |  |
| <i>Karnofsky performance score (KPS), %</i> |  |
| <i>ECOG score</i>                           |  |

Completed by: \_\_\_\_\_  
 Name                       Signature                       Date

Patient:

Name, Surname

Patient's  
entry No.

|  |  |  |
|--|--|--|
|  |  |  |
|--|--|--|

## VISIT 2-13(TREATMENT) VITAL SIGNS

|                                          |                                                                                                                          |
|------------------------------------------|--------------------------------------------------------------------------------------------------------------------------|
| <b>Were Vital Signs performed?</b>       | <input type="checkbox"/> <b>No (Comment Below)</b> <input type="checkbox"/> <b>Yes, Complete below</b><br>Comment* _____ |
| <b>Date &amp; Time of Vital Signs:</b>   | ____ / ____ / ____ : ____<br>(DD / MMM / YYYY) HH:MM                                                                     |
| <b>Blood Pressure :</b> ____ / ____ mmHg | <b>Pulse:</b> ____ beats/min                                                                                             |
| <b>Weight:</b> ____ . ____ kg            | <b>Height:</b> ____ . ____ m                                                                                             |
| <b>Temperature:</b> ____ . ____ °C       |                                                                                                                          |

SIT E > **HAEMATOLOGY**

## VISIT 2-13(TREATMENT) HAEMATOLOGY

| <b>Clinical Haematology Laboratory tests performed?</b> <input type="checkbox"/> <b>No (Comment Below)</b> <input type="checkbox"/> <b>Yes, Complete below</b><br>Comment*: _____ |       |      |                                                                                                                                                                  |
|-----------------------------------------------------------------------------------------------------------------------------------------------------------------------------------|-------|------|------------------------------------------------------------------------------------------------------------------------------------------------------------------|
| <b>Date &amp; Time of Sample:</b> ____ / ____ / ____ (DD / MM / YYYY)                                                                                                             |       |      |                                                                                                                                                                  |
| HAEMATOLOGY<br>Laboratory Parameter                                                                                                                                               | Value | Unit | If parameter indicated as out of normal range on report, please check if clinically significant). IF CS consider if it is an AE and add to log (if appropriate): |
| WBC                                                                                                                                                                               |       |      | <input type="checkbox"/> No <input type="checkbox"/> Yes                                                                                                         |
| RBC                                                                                                                                                                               |       |      | <input type="checkbox"/> No <input type="checkbox"/> Yes                                                                                                         |
| Hb                                                                                                                                                                                |       |      | <input type="checkbox"/> No <input type="checkbox"/> Yes                                                                                                         |
| HCT                                                                                                                                                                               |       |      | <input type="checkbox"/> No <input type="checkbox"/> Yes                                                                                                         |
| PLT                                                                                                                                                                               |       |      | <input type="checkbox"/> No <input type="checkbox"/> Yes                                                                                                         |
| NEUTROPHILS                                                                                                                                                                       |       |      | <input type="checkbox"/> No <input type="checkbox"/> Yes                                                                                                         |
| LYMPHOCYTES                                                                                                                                                                       |       |      | <input type="checkbox"/> No <input type="checkbox"/> Yes                                                                                                         |
| MONOCYTES                                                                                                                                                                         |       |      | <input type="checkbox"/> No <input type="checkbox"/> Yes                                                                                                         |
| EOSINOPHILS                                                                                                                                                                       |       |      | <input type="checkbox"/> No <input type="checkbox"/> Yes                                                                                                         |
| BASOPHILS                                                                                                                                                                         |       |      | <input type="checkbox"/> No <input type="checkbox"/> Yes                                                                                                         |
| RETICULOCYTES                                                                                                                                                                     |       |      | <input type="checkbox"/> No <input type="checkbox"/> Yes                                                                                                         |
| ESR                                                                                                                                                                               |       | mm/h | <input type="checkbox"/> No <input type="checkbox"/> Yes                                                                                                         |

Completed by: \_\_\_\_\_

Name

Signature

Date

Patient:

Patient's entry No.

**VISIT 2-13(TREATMENT)BIOCHEMISTRY**

Clinical Biochemistry Laboratory tests performed?  No (comment below)  Yes, Complete below

Comment: \_\_\_\_\_

Date of Sample: \_\_\_\_\_ / \_\_\_\_\_ / \_\_\_\_\_  
(DD / MM / YYYY)

| BIOCHEMISTRY<br>Laboratory Parameter | Value | Unit | If parameter indicated as out of normal range on report, please check if clinically significant: |
|--------------------------------------|-------|------|--------------------------------------------------------------------------------------------------|
| GLUCOSE                              |       |      | <input type="checkbox"/> No <input type="checkbox"/> Yes                                         |
| UREA                                 |       |      | <input type="checkbox"/> No <input type="checkbox"/> Yes                                         |
| CREATININE                           |       |      | <input type="checkbox"/> No <input type="checkbox"/> Yes                                         |
| TOTAL PROTEIN                        |       |      | <input type="checkbox"/> No <input type="checkbox"/> Yes                                         |
| TOTAL BILIRUBIN                      |       |      | <input type="checkbox"/> No <input type="checkbox"/> Yes                                         |
| ALK PHOS                             |       |      | <input type="checkbox"/> No <input type="checkbox"/> Yes                                         |
| ALT                                  |       |      | <input type="checkbox"/> No <input type="checkbox"/> Yes                                         |
| AST                                  |       |      | <input type="checkbox"/> No <input type="checkbox"/> Yes                                         |
| GGT                                  |       |      | <input type="checkbox"/> No <input type="checkbox"/> Yes                                         |
| LDH                                  |       |      | <input type="checkbox"/> No <input type="checkbox"/> Yes                                         |
| CALCIUM                              |       |      | <input type="checkbox"/> No <input type="checkbox"/> Yes                                         |
| PROTROMBINE                          |       |      | <input type="checkbox"/> No <input type="checkbox"/> Yes                                         |
| FIBRINOGEN                           |       |      | <input type="checkbox"/> No <input type="checkbox"/> Yes                                         |
|                                      |       |      | <input type="checkbox"/> No <input type="checkbox"/> Yes                                         |
|                                      |       |      | <input type="checkbox"/> No <input type="checkbox"/> Yes                                         |
|                                      |       |      | <input type="checkbox"/> No <input type="checkbox"/> Yes                                         |

Patient:

Name, Surname

Patient's  
entry No.

|  |  |  |  |
|--|--|--|--|
|  |  |  |  |
|--|--|--|--|

## VISIT 2-13(TREATMENT)OTHER TESTS

|                        |                                                        |
|------------------------|--------------------------------------------------------|
| Date & Time of Sample: | ___ / ___ / _____ : ____<br>(DD / MMM / YYYY)<br>HH:MM |
|------------------------|--------------------------------------------------------|

| <INSERT ASSESSMENT> | Value | Unit | If parameter indicated as out of normal range on report, please check if clinically significant IF CS consider if it is an AE and add to log (if appropriate)::: |
|---------------------|-------|------|------------------------------------------------------------------------------------------------------------------------------------------------------------------|
|                     |       |      | <input type="checkbox"/> No <input type="checkbox"/> Yes                                                                                                         |
|                     |       |      | <input type="checkbox"/> No <input type="checkbox"/> Yes                                                                                                         |
|                     |       |      | <input type="checkbox"/> No <input type="checkbox"/> Yes                                                                                                         |
|                     |       |      | <input type="checkbox"/> No <input type="checkbox"/> Yes                                                                                                         |

## VISIT 2-13OTHER TESTS

Patient:

Name, Surname

Patient's  
entry No.

|  |  |  |
|--|--|--|
|  |  |  |
|--|--|--|

## VISIT 2-13(TREATMENT)TRIAL MEDICATION ADMINISTRATION

### Paclitaxel and Curcumin/Placebo Administration

| No. | Medication       | Date of infusion<br>(DD/MM/YYYY) | Time of Dosing<br>(24 hr) | Dose<br>(including units) | Comment ONLY if dose delayed, interrupted, reduced or altered |
|-----|------------------|----------------------------------|---------------------------|---------------------------|---------------------------------------------------------------|
| 1.  | Curcumin/Placebo | ___/___/___                      | ___:___                   |                           |                                                               |
|     | Paclitaxel       | ___/___/___                      | ___:___                   |                           |                                                               |
| 2.  | Curcumin/Placebo | ___/___/___                      | ___:___                   |                           |                                                               |
|     | Paclitaxel       | ___/___/___                      | ___:___                   |                           |                                                               |
| 3.  | Curcumin/Placebo | ___/___/___                      | ___:___                   |                           |                                                               |
|     | Paclitaxel       | ___/___/___                      | ___:___                   |                           |                                                               |
| 4.  | Curcumin/Placebo | ___/___/___                      | ___:___                   |                           |                                                               |
|     | Paclitaxel       | ___/___/___                      | ___:___                   |                           |                                                               |
| 5.  | Curcumin/Placebo | ___/___/___                      | ___:___                   |                           |                                                               |
|     | Paclitaxel       | ___/___/___                      | ___:___                   |                           |                                                               |
| 6.  | Curcumin/Placebo | ___/___/___                      | ___:___                   |                           |                                                               |
|     | Paclitaxel       | ___/___/___                      | ___:___                   |                           |                                                               |
| 7.  | Curcumin/Placebo | ___/___/___                      | ___:___                   |                           |                                                               |
|     | Paclitaxel       | ___/___/___                      | ___:___                   |                           |                                                               |
| 8.  | Curcumin/Placebo | ___/___/___                      | ___:___                   |                           |                                                               |
|     | Paclitaxel       | ___/___/___                      | ___:___                   |                           |                                                               |
| 9.  | Curcumin/Placebo | ___/___/___                      | ___:___                   |                           |                                                               |
|     | Paclitaxel       | ___/___/___                      | ___:___                   |                           |                                                               |
| 10. | Curcumin/Placebo | ___/___/___                      | ___:___                   |                           |                                                               |
|     | Paclitaxel       | ___/___/___                      | ___:___                   |                           |                                                               |
| 11. | Curcumin/Placebo | ___/___/___                      | ___:___                   |                           |                                                               |
|     | Paclitaxel       | ___/___/___                      | ___:___                   |                           |                                                               |
| 12. | Curcumin/Placebo | ___/___/___                      | ___:___                   |                           |                                                               |
|     | Paclitaxel       | ___/___/___                      | ___:___                   |                           |                                                               |

Completed by: \_\_\_\_\_

Name

Signature

Date

Patient:

Name, Surname

Patient's  
entry No.

|  |  |  |
|--|--|--|
|  |  |  |
|--|--|--|

**ADMINISTRATION OF MEDICATION AND RETURN QUANTITY**

**DISPENSING**

| Medication                  | Date of Dispensing (DD/MM/YYYY) | Quantity Dispensed | Weekly Dose (including units) | Comment ONLY if dose delayed, reduced or altered |
|-----------------------------|---------------------------------|--------------------|-------------------------------|--------------------------------------------------|
| Paclitaxel                  | ___/___/___                     |                    |                               |                                                  |
| Curcumin/placebo (IMP pack) | ___/___/___                     |                    |                               |                                                  |

**ADMINISTRATION AND RETURN QUANTITY**

| Medication                  | Date        | Injections made | Injections left (counted) |
|-----------------------------|-------------|-----------------|---------------------------|
| Paclitaxel                  | ___/___/___ |                 |                           |
| Curcumin/placebo (IMP pack) | ___/___/___ |                 |                           |

Quantity returned: 1. Paclitaxel  
2. Curcumin/Placebo

Return date: \_\_\_/\_\_\_/\_\_\_

Doctor's signature \_\_\_\_\_

---

Date: \_\_\_\_\_ Investigators' sign: \_\_\_\_\_

Date: \_\_\_\_\_ Monitor's sign: \_\_\_\_\_

Completed by: \_\_\_\_\_

Name Signature Date

Patient:

Name, Surname

Patient's  
entry No.

|  |  |  |
|--|--|--|
|  |  |  |
|--|--|--|

## VISIT 14 (FOLLOW-UP) CLINICAL EXAMINATION

Date of Assessment: \_\_\_ / \_\_\_ / \_\_\_\_\_

(DD / MM / YYYY)

| Was Physical Examination performed?  |                          |                          |                          | <input type="checkbox"/> No                                                                                | <input type="checkbox"/> Yes, Complete below |
|--------------------------------------|--------------------------|--------------------------|--------------------------|------------------------------------------------------------------------------------------------------------|----------------------------------------------|
| System                               | *Abnormal                | Normal                   | Not done                 | *If noted ABNORMAL, please provide brief description and comment if clinically significant or not (CS/NCS) |                                              |
| <i>General Appearance</i>            | <input type="checkbox"/> | <input type="checkbox"/> | <input type="checkbox"/> |                                                                                                            |                                              |
| <i>Skin</i>                          | <input type="checkbox"/> | <input type="checkbox"/> | <input type="checkbox"/> |                                                                                                            |                                              |
| <i>Eyes, Ears, Nose &amp; Throat</i> | <input type="checkbox"/> | <input type="checkbox"/> | <input type="checkbox"/> |                                                                                                            |                                              |
| <i>Head, Neck &amp; Thyroid</i>      | <input type="checkbox"/> | <input type="checkbox"/> | <input type="checkbox"/> |                                                                                                            |                                              |
| <i>Cardiovascular</i>                | <input type="checkbox"/> | <input type="checkbox"/> | <input type="checkbox"/> |                                                                                                            |                                              |
| <i>Respiratory</i>                   | <input type="checkbox"/> | <input type="checkbox"/> | <input type="checkbox"/> |                                                                                                            |                                              |
| <i>Abdomen</i>                       | <input type="checkbox"/> | <input type="checkbox"/> | <input type="checkbox"/> |                                                                                                            |                                              |
| <i>Extremities</i>                   | <input type="checkbox"/> | <input type="checkbox"/> | <input type="checkbox"/> |                                                                                                            |                                              |
| <i>Genitalia</i>                     | <input type="checkbox"/> | <input type="checkbox"/> | <input type="checkbox"/> |                                                                                                            |                                              |
| <i>Anorectal</i>                     | <input type="checkbox"/> | <input type="checkbox"/> | <input type="checkbox"/> |                                                                                                            |                                              |
| <i>Lymph Nodes</i>                   | <input type="checkbox"/> | <input type="checkbox"/> | <input type="checkbox"/> |                                                                                                            |                                              |
| <i>Muscular-Skeletal</i>             | <input type="checkbox"/> | <input type="checkbox"/> | <input type="checkbox"/> |                                                                                                            |                                              |
| <i>Neurological</i>                  | <input type="checkbox"/> | <input type="checkbox"/> | <input type="checkbox"/> |                                                                                                            |                                              |
| <i>Breast/chestwall</i>              | <input type="checkbox"/> | <input type="checkbox"/> | <input type="checkbox"/> |                                                                                                            |                                              |
| <i>Others (please specify)</i>       | <input type="checkbox"/> | <input type="checkbox"/> | <input type="checkbox"/> |                                                                                                            |                                              |

|                                             |  |
|---------------------------------------------|--|
| <b>Patient's performance status</b>         |  |
| <i>Karnofsky performance score (KPS), %</i> |  |
| <i>ECOG score</i>                           |  |

Completed by: \_\_\_\_\_

Name

Signature

Date



Patient:

Name, Surname

Patient's entry No.

|  |  |  |
|--|--|--|
|  |  |  |
|--|--|--|

**VISIT 14 (FOLLOW-UP) VITAL SIGNS**

|                                   |                                                                                                            |
|-----------------------------------|------------------------------------------------------------------------------------------------------------|
| Were Vital Signs performed?       | <input type="checkbox"/> No (Comment Below) <input type="checkbox"/> Yes, Complete below<br>Comment* _____ |
| Date & Time of Vital Signs:       | ____ / ____ / ____ : ____<br>(DD / MMM / YYYY) HH:MM                                                       |
| Blood Pressure : ____ / ____ mmHg | Pulse: ____ beats/min                                                                                      |
| Weight: ____ . ____ kg            | Height: ____ . ____ m                                                                                      |
| Temperature: ____ . ____ °C       |                                                                                                            |

SIT E>**HAEMATOLOGY**

**VISIT 14 (FOLLOW-UP) HAEMATOLOGY**

| Clinical Haematology Laboratory tests performed? |       |      |                                                                                                                                                                  | <input type="checkbox"/> No (Comment Below) <input type="checkbox"/> Yes, Complete below<br>Comment*: _____ |
|--------------------------------------------------|-------|------|------------------------------------------------------------------------------------------------------------------------------------------------------------------|-------------------------------------------------------------------------------------------------------------|
| Date & Time of Sample:                           |       |      |                                                                                                                                                                  | ____ / ____ / ____ (DD / MM / YYYY)                                                                         |
| HAEMATOLOGY<br>Laboratory Parameter              | Value | Unit | If parameter indicated as out of normal range on report, please check if clinically significant). IF CS consider if it is an AE and add to log (if appropriate): |                                                                                                             |
| WBC                                              |       |      | <input type="checkbox"/> No                                                                                                                                      | <input type="checkbox"/> Yes                                                                                |
| RBC                                              |       |      | <input type="checkbox"/> No                                                                                                                                      | <input type="checkbox"/> Yes                                                                                |
| Hb                                               |       |      | <input type="checkbox"/> No                                                                                                                                      | <input type="checkbox"/> Yes                                                                                |
| HCT                                              |       |      | <input type="checkbox"/> No                                                                                                                                      | <input type="checkbox"/> Yes                                                                                |
| PLT                                              |       |      | <input type="checkbox"/> No                                                                                                                                      | <input type="checkbox"/> Yes                                                                                |
| NEUTROPHILS                                      |       |      | <input type="checkbox"/> No                                                                                                                                      | <input type="checkbox"/> Yes                                                                                |
| LYMPHOCYTES                                      |       |      | <input type="checkbox"/> No                                                                                                                                      | <input type="checkbox"/> Yes                                                                                |
| MONOCYTES                                        |       |      | <input type="checkbox"/> No                                                                                                                                      | <input type="checkbox"/> Yes                                                                                |
| EOSINOPHILS                                      |       |      | <input type="checkbox"/> No                                                                                                                                      | <input type="checkbox"/> Yes                                                                                |
| BASOPHILS                                        |       |      | <input type="checkbox"/> No                                                                                                                                      | <input type="checkbox"/> Yes                                                                                |
| RETICULOCYTES                                    |       |      | <input type="checkbox"/> No                                                                                                                                      | <input type="checkbox"/> Yes                                                                                |
| ESR                                              |       | mm/h | <input type="checkbox"/> No                                                                                                                                      | <input type="checkbox"/> Yes                                                                                |

Completed by: \_\_\_\_\_

Name

Signature

Date

Patient:

Name, Surname

Patient's  
entry No.

|  |  |  |
|--|--|--|
|  |  |  |
|--|--|--|

## VISIT 14 (FOLLOW-UP) BIOCHEMISTRY

|                                                                                                                                                                                                    |
|----------------------------------------------------------------------------------------------------------------------------------------------------------------------------------------------------|
| Clinical Biochemistry Laboratory tests performed? <span style="float: right;"> <input type="checkbox"/> No (comment below)    <input type="checkbox"/> Yes, Complete below                 </span> |
| Comment: _____                                                                                                                                                                                     |
| Date of Sample: _____ / _____ / _____<br>(DD / MM / YYYY)                                                                                                                                          |

| BIOCHEMISTRY<br>Laboratory Parameter | Value | Unit | If parameter indicated as out of normal range on report, please check if clinically significant: |
|--------------------------------------|-------|------|--------------------------------------------------------------------------------------------------|
| GLUCOSE                              |       |      | <input type="checkbox"/> No <input type="checkbox"/> Yes                                         |
| UREA                                 |       |      | <input type="checkbox"/> No <input type="checkbox"/> Yes                                         |
| CREATININE                           |       |      | <input type="checkbox"/> No <input type="checkbox"/> Yes                                         |
| TOTAL PROTEIN                        |       |      | <input type="checkbox"/> No <input type="checkbox"/> Yes                                         |
| TOTAL BILIRUBIN                      |       |      | <input type="checkbox"/> No <input type="checkbox"/> Yes                                         |
| ALK PHOS                             |       |      | <input type="checkbox"/> No <input type="checkbox"/> Yes                                         |
| ALT                                  |       |      | <input type="checkbox"/> No <input type="checkbox"/> Yes                                         |
| AST                                  |       |      | <input type="checkbox"/> No <input type="checkbox"/> Yes                                         |
| GGT                                  |       |      | <input type="checkbox"/> No <input type="checkbox"/> Yes                                         |
| LDH                                  |       |      | <input type="checkbox"/> No <input type="checkbox"/> Yes                                         |
| CALCIUM                              |       |      | <input type="checkbox"/> No <input type="checkbox"/> Yes                                         |
| PROTROMBINE                          |       |      | <input type="checkbox"/> No <input type="checkbox"/> Yes                                         |
| FIBRINOGEN                           |       |      | <input type="checkbox"/> No <input type="checkbox"/> Yes                                         |
|                                      |       |      | <input type="checkbox"/> No <input type="checkbox"/> Yes                                         |
|                                      |       |      | <input type="checkbox"/> No <input type="checkbox"/> Yes                                         |
|                                      |       |      | <input type="checkbox"/> No <input type="checkbox"/> Yes                                         |
|                                      |       |      | <input type="checkbox"/> No <input type="checkbox"/> Yes                                         |

Completed by: \_\_\_\_\_

Name

Signature

Date

Patient:

Name, Surname

Patient's  
entry No.

|  |  |  |
|--|--|--|
|  |  |  |
|--|--|--|

**VISIT 14 (FOLLOW-UP) RECIST TESTS**

**X-ray:**

**CT:**

**MRI:**

Completed by: \_\_\_\_\_

Name

Signature

Date

Patient:

Name, Surname

Patient's  
entry No.

|  |  |  |
|--|--|--|
|  |  |  |
|--|--|--|

## VISIT 15 (FOLLOW-UP) CLINICAL EXAMINATION

Date of Assessment: \_\_\_ / \_\_\_ / \_\_\_\_\_

(DD / MM / YYYY)

| Was Physical Examination performed?  |                          |                          |                          | <input type="checkbox"/> No <input type="checkbox"/> Yes, Complete below                                   |
|--------------------------------------|--------------------------|--------------------------|--------------------------|------------------------------------------------------------------------------------------------------------|
| System                               | *Abnormal                | Normal                   | Not done                 | *If noted ABNORMAL, please provide brief description and comment if clinically significant or not (CS/NCS) |
| <i>General Appearance</i>            | <input type="checkbox"/> | <input type="checkbox"/> | <input type="checkbox"/> |                                                                                                            |
| <i>Skin</i>                          | <input type="checkbox"/> | <input type="checkbox"/> | <input type="checkbox"/> |                                                                                                            |
| <i>Eyes, Ears, Nose &amp; Throat</i> | <input type="checkbox"/> | <input type="checkbox"/> | <input type="checkbox"/> |                                                                                                            |
| <i>Head, Neck &amp; Thyroid</i>      | <input type="checkbox"/> | <input type="checkbox"/> | <input type="checkbox"/> |                                                                                                            |
| <i>Cardiovascular</i>                | <input type="checkbox"/> | <input type="checkbox"/> | <input type="checkbox"/> |                                                                                                            |
| <i>Respiratory</i>                   | <input type="checkbox"/> | <input type="checkbox"/> | <input type="checkbox"/> |                                                                                                            |
| <i>Abdomen</i>                       | <input type="checkbox"/> | <input type="checkbox"/> | <input type="checkbox"/> |                                                                                                            |
| <i>Extremities</i>                   | <input type="checkbox"/> | <input type="checkbox"/> | <input type="checkbox"/> |                                                                                                            |
| <i>Genitalia</i>                     | <input type="checkbox"/> | <input type="checkbox"/> | <input type="checkbox"/> |                                                                                                            |
| <i>Anorectal</i>                     | <input type="checkbox"/> | <input type="checkbox"/> | <input type="checkbox"/> |                                                                                                            |
| <i>Lymph Nodes</i>                   | <input type="checkbox"/> | <input type="checkbox"/> | <input type="checkbox"/> |                                                                                                            |
| <i>Muscular-Skeletal</i>             | <input type="checkbox"/> | <input type="checkbox"/> | <input type="checkbox"/> |                                                                                                            |
| <i>Neurological</i>                  | <input type="checkbox"/> | <input type="checkbox"/> | <input type="checkbox"/> |                                                                                                            |
| <i>Breast/chestwall</i>              | <input type="checkbox"/> | <input type="checkbox"/> | <input type="checkbox"/> |                                                                                                            |
| <i>Others (please specify)</i>       | <input type="checkbox"/> | <input type="checkbox"/> | <input type="checkbox"/> |                                                                                                            |

|                                             |  |
|---------------------------------------------|--|
| <b>Patient's performance status</b>         |  |
| <i>Karnofsky performance score (KPS), %</i> |  |
| <i>ECOG score</i>                           |  |

Completed by: \_\_\_\_\_

Name

Signature

Date

Patient:

Patient's entry No.

**VISIT 15 (FOLLOW-UP) VITAL SIGNS**

|                                   |                                                                                                            |
|-----------------------------------|------------------------------------------------------------------------------------------------------------|
| Were Vital Signs performed?       | <input type="checkbox"/> No (Comment Below) <input type="checkbox"/> Yes, Complete below<br>Comment* _____ |
| Date & Time of Vital Signs:       | ____ / ____ / ____ : ____<br>(DD / MMM / YYYY) HH:MM                                                       |
| Blood Pressure : ____ / ____ mmHg | Pulse: ____ beats/min                                                                                      |
| Weight: ____ . ____ kg            | Height: ____ . ____ m                                                                                      |
| Temperature: ____ . ____ °C       |                                                                                                            |

**VISIT 15 (FOLLOW-UP) OTHER ASSESMENTS**

Other tests (on discretion of investigators):

Patient:

Name, Surname

Patient's  
entry No.

|  |  |  |
|--|--|--|
|  |  |  |
|--|--|--|

## VISIT 15 (FOLLOW-UP) PRIMARY OUTCOMES

### 1. RECIST Assessments

| Examination | Visit 1<br>(baseline) | Visit 14 | Visit 15 |
|-------------|-----------------------|----------|----------|
| Clinical    |                       |          |          |
| X-ray       |                       |          |          |
| CT          |                       |          |          |
| MRI         |                       |          |          |

### 2. Tumour markers

| Marker | Visit 1<br>(baseline) | Visit 13 (14) | Visit 15 |
|--------|-----------------------|---------------|----------|
| CEA    |                       |               |          |
| CA15-3 |                       |               |          |

### RESIST Outcome (change from baseline)

| Outcome                  | Visit 14 | Visit 15 | Comments /date of event<br>observed |
|--------------------------|----------|----------|-------------------------------------|
| Progressive Disease (PD) |          |          |                                     |
| Stable Disease (SD)      |          |          |                                     |
| Partial Response (PR)    |          |          |                                     |
| Complete response (CR)   |          |          |                                     |

Completed by: \_\_\_\_\_

Name

Signature

Date

Patient:

Name, Surname

Patient's  
entry No.

|  |  |  |
|--|--|--|
|  |  |  |
|--|--|--|

## VISIT 15 (FOLLOW-UP) SECONDARY OUTCOMES

### 1. Adverse Events (to be filled in according the Adverse Event Page)

### 2. Quality of Life (EORTC QLQ-C30, Global Health Status/QoL scales)

| Scale                      | Visit 2<br>(baseline) | Visit 13 (end of<br>treatment) | Visit 14 | Visit 15 |
|----------------------------|-----------------------|--------------------------------|----------|----------|
| Overall physical condition |                       |                                |          |          |
| Overall quality of life    |                       |                                |          |          |

### 3. Response duration

Event (specify) \_\_\_\_\_

Date of event:     \_\_ / \_\_ / \_\_\_\_  
                                  (DD / MM / YYYY)

| Measurement                      | Duration (weeks) | Comments |
|----------------------------------|------------------|----------|
| Progression free survival (PFS)  |                  |          |
| Time to Treatment Failure (TTTF) |                  |          |
| Time to Tumour Progression (TTP) |                  |          |

Completed by: \_\_\_\_\_

Name

Signature

Date

Patient:

Name, Surname

Patient's entry No.

|  |  |  |
|--|--|--|
|  |  |  |
|--|--|--|

## TRIAL COMPLETION

|                                                   |                                                                                                                                                                                                                                                                                                                                                                                                                         |
|---------------------------------------------------|-------------------------------------------------------------------------------------------------------------------------------------------------------------------------------------------------------------------------------------------------------------------------------------------------------------------------------------------------------------------------------------------------------------------------|
| <p><b>Did participant complete the trial?</b></p> | <p><input type="checkbox"/> <b>Yes</b>, Please provide <b>date of last visit</b>:</p> <p style="text-align: center;">             ___ / ___ / 20___<br/>             (DD / MM / YYYY)         </p> <p><input type="checkbox"/> <b>No</b>, Please provide <b>date of withdrawal</b> and complete below:</p> <p style="text-align: center;">             ___ / ___ / 20___<br/>             (DD / MM / YYYY)         </p> |
|---------------------------------------------------|-------------------------------------------------------------------------------------------------------------------------------------------------------------------------------------------------------------------------------------------------------------------------------------------------------------------------------------------------------------------------------------------------------------------------|

**Early Withdrawal: please tick most appropriate reason for participant not completing the trial:**

**Adverse Events related:** please state related AE: \_\_\_\_\_ (add details to AE page)

**Participant's decision, specify:** \_\_\_\_\_, date \_\_\_ / \_\_\_ / \_\_\_\_\_

**Investigator's decision, specify:** \_\_\_\_\_, date \_\_\_ / \_\_\_ / \_\_\_\_\_

**Sponsor's decision**

**Lost to follow up** \_\_\_\_\_, date \_\_\_ / \_\_\_ / \_\_\_\_\_

**Patient deceased** \_\_\_\_\_, date \_\_\_ / \_\_\_ / \_\_\_\_\_

**Other, specify:** \_\_\_\_\_



Site NCO, Yerevan, Armenia

Patient: Name, Surname

Patient's entry No.

## ADVERSE EVENTS PAGE

| AE No | Event Name<br><small>(Please give Diagnosis if known)</small> | Start date<br><small>(DD/MMM/YYYY)</small> | Stop date<br><small>(DD/MMM/YYYY)</small> | Serious?<br><small>If serious, please complete a JRO SAE form</small> | Con-comitant Medication given                               | Severity<br><small>0 - Mild<br/>1- Moderate<br/>2 - Severe</small> | Study Drug Action<br><small>0 - None<br/>1 - Temporarily Interrupted<br/>2 - permanently withdrawn</small> | Outcome<br><small>0 - Resolved<br/>1- Resolved with sequelea<br/>2 - Not resolved</small> | Relationship to Study Drug<br><small>0 - Definitely<br/>1 - Probably<br/>2 - Possibly<br/>3 - Unlikely<br/>4 - Not related<br/>5 - Not assessable</small> |
|-------|---------------------------------------------------------------|--------------------------------------------|-------------------------------------------|-----------------------------------------------------------------------|-------------------------------------------------------------|--------------------------------------------------------------------|------------------------------------------------------------------------------------------------------------|-------------------------------------------------------------------------------------------|-----------------------------------------------------------------------------------------------------------------------------------------------------------|
| 1     |                                                               | _ / _ / _                                  | _ / _ / _                                 | <input type="checkbox"/> No<br><input type="checkbox"/> Yes           | <input type="checkbox"/> No<br><input type="checkbox"/> Yes |                                                                    |                                                                                                            |                                                                                           |                                                                                                                                                           |
| 2     |                                                               | _ / _ / _                                  | _ / _ / _                                 | <input type="checkbox"/> No<br><input type="checkbox"/> Yes           | <input type="checkbox"/> No<br><input type="checkbox"/> Yes |                                                                    |                                                                                                            |                                                                                           |                                                                                                                                                           |
| 3     |                                                               | _ / _ / _                                  | _ / _ / _                                 | <input type="checkbox"/> No<br><input type="checkbox"/> Yes           | <input type="checkbox"/> No<br><input type="checkbox"/> Yes |                                                                    |                                                                                                            |                                                                                           |                                                                                                                                                           |
| 4     |                                                               | _ / _ / _                                  | _ / _ / _                                 | <input type="checkbox"/> No<br><input type="checkbox"/> Yes           | <input type="checkbox"/> No<br><input type="checkbox"/> Yes |                                                                    |                                                                                                            |                                                                                           |                                                                                                                                                           |
| 5     |                                                               | _ / _ / _                                  | _ / _ / _                                 | <input type="checkbox"/> No<br><input type="checkbox"/> Yes           | <input type="checkbox"/> No<br><input type="checkbox"/> Yes |                                                                    |                                                                                                            |                                                                                           |                                                                                                                                                           |
| 6     |                                                               | _ / _ / _                                  | _ / _ / _                                 | <input type="checkbox"/> No<br><input type="checkbox"/> Yes           | <input type="checkbox"/> No<br><input type="checkbox"/> Yes |                                                                    |                                                                                                            |                                                                                           |                                                                                                                                                           |

I have reviewed the AEs on this page and have assessed them for seriousness, causality, severity and outcome and confirm that, to the best of my knowledge, it accurately reflects the study information obtained for this participant

PI signature \_\_\_\_\_ Date: \_\_\_\_\_  Please check box if this is the last page used

Completed by: \_\_\_\_\_  
Name Signature Date

Patient:

Patient's entry No.

**ADVERSE EVENTS PAGE (CONTINUATION PAGE)**

| AE No | Event Name<br>(Please give Diagnosis if known) | Start date<br>(DD/MMM/YYYY) | Stop date<br>(DD/MMM/YYYY) | Serious?<br>If serious, please complete a JRO SAE form      | Concomitant Medication given                                | Severity<br>0 - Mild<br>1- Moderate<br>2 - Severe | Study Drug Action<br>0 - None<br>1 - Temporarily Interrupted<br>2 - permanently withdrawn | Outcome<br>0 - Resolved<br>1- Resolved with sequelae<br>2 - Not resolved | Relationship to Study Drug<br>0 - Definitely<br>1 - Probably<br>2 - Possibly<br>3 - Unlikely<br>4 - Not related<br>5 - Not assessable |
|-------|------------------------------------------------|-----------------------------|----------------------------|-------------------------------------------------------------|-------------------------------------------------------------|---------------------------------------------------|-------------------------------------------------------------------------------------------|--------------------------------------------------------------------------|---------------------------------------------------------------------------------------------------------------------------------------|
| —     |                                                | ___/___/___                 | ___/___/___                | <input type="checkbox"/> No<br><input type="checkbox"/> Yes | <input type="checkbox"/> No<br><input type="checkbox"/> Yes |                                                   |                                                                                           |                                                                          |                                                                                                                                       |
| —     |                                                | ___/___/___                 | ___/___/___                | <input type="checkbox"/> No<br><input type="checkbox"/> Yes | <input type="checkbox"/> No<br><input type="checkbox"/> Yes |                                                   |                                                                                           |                                                                          |                                                                                                                                       |
| —     |                                                | ___/___/___                 | ___/___/___                | <input type="checkbox"/> No<br><input type="checkbox"/> Yes | <input type="checkbox"/> No<br><input type="checkbox"/> Yes |                                                   |                                                                                           |                                                                          |                                                                                                                                       |
| —     |                                                | ___/___/___                 | ___/___/___                | <input type="checkbox"/> No<br><input type="checkbox"/> Yes | <input type="checkbox"/> No<br><input type="checkbox"/> Yes |                                                   |                                                                                           |                                                                          |                                                                                                                                       |
| —     |                                                | ___/___/___                 | ___/___/___                | <input type="checkbox"/> No<br><input type="checkbox"/> Yes | <input type="checkbox"/> No<br><input type="checkbox"/> Yes |                                                   |                                                                                           |                                                                          |                                                                                                                                       |
| —     |                                                | ___/___/___                 | ___/___/___                | <input type="checkbox"/> No<br><input type="checkbox"/> Yes | <input type="checkbox"/> No<br><input type="checkbox"/> Yes |                                                   |                                                                                           |                                                                          |                                                                                                                                       |

I have reviewed the AEs on this page and have assessed them for seriousness, causality, severity and outcome and confirm that, to the best of my knowledge, it accurately reflects the study information obtained for this participant

PI signature \_\_\_\_\_ Date: \_\_\_\_\_

Please check box if this is the last page used

Completed by: \_\_\_\_\_  
Name Signature Date

Site NCO, Yerevan, Armenia

Patient's entry No.

Patient: Name, Surname

## CONCOMITANT MEDICATIONS LOG

| Has the participant used any Concomitant Medications? <input type="checkbox"/> No <input type="checkbox"/> Yes, Complete below |                                                                                  |                                            |                                           |                                     |                                                                                                           |                                |       |           |
|--------------------------------------------------------------------------------------------------------------------------------|----------------------------------------------------------------------------------|--------------------------------------------|-------------------------------------------|-------------------------------------|-----------------------------------------------------------------------------------------------------------|--------------------------------|-------|-----------|
| CM No.                                                                                                                         | Medication name<br><small>(Record &lt;specify Generic or Brand&gt; name)</small> | Start date<br><small>(DD/MMM/YYYY)</small> | Stop date<br><small>(DD/MMM/YYYY)</small> | Or tick if ongoing at end of study? | Reason for use<br><small>(Enter related AE diagnosis, or other reasons for use, e.g. Prophylaxis)</small> | Dose<br><small>(Units)</small> | Route | Frequency |
| 1.                                                                                                                             |                                                                                  | _ / _ / _                                  | _ / _ / _                                 | <input type="checkbox"/>            |                                                                                                           |                                |       |           |
| 2.                                                                                                                             |                                                                                  | _ / _ / _                                  | _ / _ / _                                 | <input type="checkbox"/>            |                                                                                                           |                                |       |           |
| 3.                                                                                                                             |                                                                                  | _ / _ / _                                  | _ / _ / _                                 | <input type="checkbox"/>            |                                                                                                           |                                |       |           |
| 4.                                                                                                                             |                                                                                  | _ / _ / _                                  | _ / _ / _                                 | <input type="checkbox"/>            |                                                                                                           |                                |       |           |
| 5.                                                                                                                             |                                                                                  | _ / _ / _                                  | _ / _ / _                                 | <input type="checkbox"/>            |                                                                                                           |                                |       |           |
| 6.                                                                                                                             |                                                                                  | _ / _ / _                                  | _ / _ / _                                 | <input type="checkbox"/>            |                                                                                                           |                                |       |           |
| 7.                                                                                                                             |                                                                                  | _ / _ / _                                  | _ / _ / _                                 | <input type="checkbox"/>            |                                                                                                           |                                |       |           |
| <input type="checkbox"/> Please check box if this is the last page used                                                        |                                                                                  |                                            |                                           |                                     |                                                                                                           |                                |       |           |

Note: Use the Concomittent log to record Non-IMPs

Completed by: \_\_\_\_\_

Patient: Name, Surname

Patient's entry No.

## CONCOMITANT MEDICATIONS LOG (CONTINUATION PAGE)

| CM No.                                                                  | Medication name<br>(Record Generic name) | Start date<br>(DD/MMM/YYYY) | Stop date<br>(DD/MMM/YYYY) | Or tick if ongoing at end of study? | Reason for use<br>(Enter related AE diagnosis, or other reasons for use, e.g. Prophylaxis) | Dose<br>(Units) | Route | Frequency |
|-------------------------------------------------------------------------|------------------------------------------|-----------------------------|----------------------------|-------------------------------------|--------------------------------------------------------------------------------------------|-----------------|-------|-----------|
| —.                                                                      |                                          | _ / _ / _                   | _ / _ / _                  | <input type="checkbox"/>            |                                                                                            |                 |       |           |
| —.                                                                      |                                          | _ / _ / _                   | _ / _ / _                  | <input type="checkbox"/>            |                                                                                            |                 |       |           |
| —.                                                                      |                                          | _ / _ / _                   | _ / _ / _                  | <input type="checkbox"/>            |                                                                                            |                 |       |           |
| —.                                                                      |                                          | _ / _ / _                   | _ / _ / _                  | <input type="checkbox"/>            |                                                                                            |                 |       |           |
| —.                                                                      |                                          | _ / _ / _                   | _ / _ / _                  | <input type="checkbox"/>            |                                                                                            |                 |       |           |
| —.                                                                      |                                          | _ / _ / _                   | _ / _ / _                  | <input type="checkbox"/>            |                                                                                            |                 |       |           |
| —.                                                                      |                                          | _ / _ / _                   | _ / _ / _                  | <input type="checkbox"/>            |                                                                                            |                 |       |           |
| —.                                                                      |                                          | _ / _ / _                   | _ / _ / _                  | <input type="checkbox"/>            |                                                                                            |                 |       |           |
| <input type="checkbox"/> Please check box if this is the last page used |                                          |                             |                            |                                     |                                                                                            |                 |       |           |

Completed by: \_\_\_\_\_

Patient: Name, Surname

Patient's entry No.

## PRINICIPAL INVESTIGATOR'S SIGN OFF

**Principal Investigator's Signature Statement:**

I have reviewed this CRF and confirm that, to the best of my knowledge, it accurately reflects the study information obtained for this participant. All entries were made either by me or by a person under my supervision who has signed the Delegation and Signature Log.

|                                                                                                                                                                                                                                                                                                                          |                                                                                                                                                                      |
|--------------------------------------------------------------------------------------------------------------------------------------------------------------------------------------------------------------------------------------------------------------------------------------------------------------------------|----------------------------------------------------------------------------------------------------------------------------------------------------------------------|
| <p><b>Principal Investigator's Signature:</b></p><br><br><hr style="border: 0; border-top: 1px solid black; margin-bottom: 10px;"/> <p><b>Principal Investigator's Name:</b></p><br><br><hr style="border: 0; border-top: 1px solid black; margin-bottom: 10px;"/> <hr style="border: 0; border-top: 1px solid black;"/> | <p><b>Date of Signature:</b>     <u>   </u> / <u>   </u> / <u>   </u> - <u>   </u> - <u>   </u> - <u>   </u></p> <p style="text-align: center;">(DD / MM / YYYY)</p> |
|--------------------------------------------------------------------------------------------------------------------------------------------------------------------------------------------------------------------------------------------------------------------------------------------------------------------------|----------------------------------------------------------------------------------------------------------------------------------------------------------------------|

|                                                                                                                                                                                                                                                                                            |                                                                                                                                                                      |
|--------------------------------------------------------------------------------------------------------------------------------------------------------------------------------------------------------------------------------------------------------------------------------------------|----------------------------------------------------------------------------------------------------------------------------------------------------------------------|
| <p><b>Monitor's Signature:</b></p><br><br><hr style="border: 0; border-top: 1px solid black; margin-bottom: 10px;"/> <p><b>Monitor's Name:</b></p><br><br><hr style="border: 0; border-top: 1px solid black; margin-bottom: 10px;"/> <hr style="border: 0; border-top: 1px solid black;"/> | <p><b>Date of Signature:</b>     <u>   </u> / <u>   </u> / <u>   </u> - <u>   </u> - <u>   </u> - <u>   </u></p> <p style="text-align: center;">(DD / MM / YYYY)</p> |
|--------------------------------------------------------------------------------------------------------------------------------------------------------------------------------------------------------------------------------------------------------------------------------------------|----------------------------------------------------------------------------------------------------------------------------------------------------------------------|

**ONCE SIGNED, NO FURTHER CHANGES CAN BE MADE TO THIS CRF WITHOUT A SIGNED DATA QUERY FORM.**

Patient: Name, Surname

Patient's entry No.

## QOL ASSESSMENTS (EORTC QLQ-C30, GLOBAL HEALTH STATUS/QOL SCALES)

### 1. Visit 2 (baseline)

How would you rate your overall **physical condition** during the past week?

|           |   |   |   |   |   |           |
|-----------|---|---|---|---|---|-----------|
| 1         | 2 | 3 | 4 | 5 | 6 | 7         |
| Very poor |   |   |   |   |   | Excellent |

How would you rate your overall **quality of life** during the past week?

|           |   |   |   |   |   |           |
|-----------|---|---|---|---|---|-----------|
| 1         | 2 | 3 | 4 | 5 | 6 | 7         |
| Very poor |   |   |   |   |   | Excellent |

Patient's signature \_\_\_\_\_ date \_\_\_/\_\_\_/\_\_\_

### 2. Visit 13 (End of Treatment)

How would you rate your overall **physical condition** during the past week?

|           |   |   |   |   |   |           |
|-----------|---|---|---|---|---|-----------|
| 1         | 2 | 3 | 4 | 5 | 6 | 7         |
| Very poor |   |   |   |   |   | Excellent |

How would you rate your overall **quality of life** during the past week?

|           |   |   |   |   |   |           |
|-----------|---|---|---|---|---|-----------|
| 1         | 2 | 3 | 4 | 5 | 6 | 7         |
| Very poor |   |   |   |   |   | Excellent |

Patient's signature \_\_\_\_\_ date \_\_\_/\_\_\_/\_\_\_

### 3. Visit 14

How would you rate your overall **physical condition** during the past week?

|           |   |   |   |   |   |           |
|-----------|---|---|---|---|---|-----------|
| 1         | 2 | 3 | 4 | 5 | 6 | 7         |
| Very poor |   |   |   |   |   | Excellent |

How would you rate your overall **quality of life** during the past week?

|           |   |   |   |   |   |           |
|-----------|---|---|---|---|---|-----------|
| 1         | 2 | 3 | 4 | 5 | 6 | 7         |
| Very poor |   |   |   |   |   | Excellent |

Patient's signature \_\_\_\_\_ date \_\_\_/\_\_\_/\_\_\_

### 4. Visit 15

How would you rate your overall **physical condition** during the past week?

|           |   |   |   |   |   |           |
|-----------|---|---|---|---|---|-----------|
| 1         | 2 | 3 | 4 | 5 | 6 | 7         |
| Very poor |   |   |   |   |   | Excellent |

How would you rate your overall **quality of life** during the past week?

|           |   |   |   |   |   |           |
|-----------|---|---|---|---|---|-----------|
| 1         | 2 | 3 | 4 | 5 | 6 | 7         |
| Very poor |   |   |   |   |   | Excellent |

Patient's signature \_\_\_\_\_ date \_\_\_/\_\_\_/\_\_\_

Completed by: \_\_\_\_\_  
Name
Signature
Date

Patient: 

|               |
|---------------|
| Name, Surname |
|---------------|

Patient's entry No. 

|  |  |  |
|--|--|--|
|  |  |  |
|--|--|--|

**PATIENT INFORMATION LEAFLET**

Patient: 

|               |
|---------------|
| Name, Surname |
|---------------|

Patient's entry No. 

|  |  |  |
|--|--|--|
|  |  |  |
|--|--|--|

**INFORMED CONSENT FORM**

*This Informed Consent Form should not be signed until you have been described and received written detailed information about the Study, the Study Drug and the Study Conditions.*

Informed Consent Form for Clinical Study of  
**"CURCUMIN" IN COMBINATION WITH CHEMOTHERAPY IN ADVANCED BREAST  
CANCER"**

I \_\_\_\_\_ confirm that:  
Print name

- I have been described and provided with a written detailed explanation of the study objectives, procedure, expected effects, possible inconveniencies and benefits, and an explanation regarding the confidentiality of the data collected during the Study.
- I have reviewed and have fully understood the content of the above mentioned informative sheet. All my questions regarding this study have been explained in detail. I have been provided with the copies of the "Informative Sheet for the Study Subjects" and the "Informed Consent Form".
- I have had enough time to make a positive or negative decision on my participation in this study.
- I agree that the representatives of the BRIU GmbH, Principal Investigator and Ethic Committee may receive medical data concerning this Study, with my participation, on condition that the information will be kept in strictest confidence.
- It is my obligation to inform the Doctor/Principal Investigator about any, and every, adverse event, and strictly follow his instructions and advice.
- I voluntarily agree to participate in this study, knowing that I can withdraw from participation at any time, without explanation and this will not affect the following medical care by the physician.
- I understand and agree that if I have given any incorrect, misinformation, or misled the Study Organizers in any way, all of my legal rights, redress, benefits, both cash or otherwise, are null and void and I cannot and will not hold the Study Organizers responsible for any current or future adverse effects due to my participation in this Study.
- I voluntarily agree to participate in the current study. I know that I have the right to withdraw from participation at any time, without explanation.

Patient's Full Name \_\_\_\_\_ Passport N \_\_\_\_\_

Date \_\_\_\_\_ Signature \_\_\_\_\_

Medical Investigator's Full Name \_\_\_\_\_

Date \_\_\_\_\_ Signature \_\_\_\_\_

Completed by: \_\_\_\_\_  
Name Signature Date
